# Supplementary material for: The hidden anatomy of paranasal sinuses reveals biogeographically distinct morphotypes in the nine-banded armadillo (Dasypus novemcinctus)
Source: PeerJ. 2017 Aug 15;5:e3593. doi: 10.7717/peerj.3593 (PMC5562141; doi:10.7717/peerj.3593)
Supplement: Table S1 [file peerj-05-3593-s002.xlsx]

## Sheet: Feuil1
	Museum-N°	Genus	species	Stage	Sex	Distribution	SINUS group	SINUSES virtually reconstructed	Sinus through bone transparency (photos (P) or Meshtools (M) / Landmark (L) softwares)	CT-scan details or photographs
AMNH	32356	Dasypus	novemcinctus		Male	Colombia, Cauca Popayan, Cerro Munchique	Problematic	X		CT-scan platform at Univ. Montpellier (France); Resolution (after binning): 72,8µm
AMNH	37356	Dasypus	novemcinctus			Colombia, Cundinamarca, Anolaima	Problematic	X		CT-scan platform at Univ. Montpellier (France); Resolution (after binning): 72,8µm
AMNH	133329	Dasypus	novemcinctus		Male	Brazil, Mato Grosso do Sul, Maracaju	Southern	X		CT-scan platform at Univ. Montpellier (France); Resolution (after binning): 72,8µm
AMNH	14663	Dasypus	novemcinctus			Colombia, Mgdalena, Santa marta, Bonda	Southern	X		CT-scan platform at Univ. Montpellier (France); Resolution (after binning): 72,8µm
AMNH	40984	Dasypus	novemcinctus		Male	Ecuador, El Oro, Portovelo	Northern	X		CT-scan platform at Univ. Montpellier (France); Resolution (after binning): 72,8µm
AMNH	42883	Dasypus	novemcinctus		Female	Guyana, Cuyuni, Mazaruni Region, Kartabo Point	Guianan	X		CT-scan platform at Univ. Montpellier (France); Resolution (after binning): 72,8µm
AMNH	75896	Dasypus	novemcinctus		Female	Brazil, Santa Catarina, Joinville, Salto Pirah	Southern	X		CT-scan platform at Univ. Montpellier (France); Resolution (after binning): 72,8µm
AMNH	133338	Dasypus	novemcinctus	juv	Male	Brazil, Para, Ilha de Marajo, Curralinho	Southern	X		CT-scan platform at Univ. Montpellier (France); Resolution (after binning): 72,8µm
AMNH	136252	Dasypus	novemcinctus		Male	Colombian, Meta, Villavicencio	Southern	X		CT-scan platform at Univ. Montpellier (France); Resolution (after binning): 72,8µm
AMNH	211668	Dasypus	novemcinctus		Female	Bolivia, Beni, Cercado, ca. 23 kilometers west of San Javier	Southern	X		CT-scan platform at Univ. Montpellier (France); Resolution (after binning): 72,8µm
AMNH	247661	Dasypus	novemcinctus		Male	Bolivia, Santa Cruz, Cordillera, 7 kilometers east and 3km north of Ingenio Mora	Southern		P	Photo of specimen (GB or LH)
AMNH	262658	Dasypus	novemcinctus			Bolivia, Pando, 5kms upstream from Cachuela	Southern		P	Photo of specimen (GB or LH)
AMNH	263287	Dasypus	novemcinctus		Male	Bolivia, Santa Cruz, Andres Ibanez, Ayacucho	Southern		M	CT-scan platform at Univ. Montpellier (France); Resolution (after binning): 72,8µm
AMNH	29828	Dasypus	novemcinctus			Nicaragua, Pena blanca	Northern		P	Photo of specimen (GB or LH)
AMNH	208100	Dasypus	novemcinctus			Peru, Luisiana, Apurimac river	Southern		P	Photo of specimen (GB or LH)
AMNH	5942	Dasypus	novemcinctus			Trinidad, Caparo	Southern		P	Photo of specimen (GB or LH)
AMNH	139834	Dasypus	novemcinctus			Costa Rica, Cataratos, San Carlos	Northern		P	Photo of specimen (GB or LH)
AMNH	68607	Dasypus	novemcinctus			Guatemala, El Cipres	Northern		P	Photo of specimen (GB or LH)
AMNH	146591	Dasypus	novemcinctus			Belize; Belize District; Gales Point; Manatee	Northern		P	Photo of specimen (GB or LH)
AMNH	140496	Dasypus	novemcinctus			Guyana	Guianan		P	Photo of specimen (GB or LH)
AMNH	128131	Dasypus	novemcinctus			Honduras, Tegucigalpa, La Cuerva Archago	Northern		P	Photo of specimen (GB or LH)
AMNH	128135	Dasypus	novemcinctus			Honduras, Tegucigalpa, La Cuerva Archago	Northern		P	Photo of specimen (GB or LH)
AMNH	128136	Dasypus	novemcinctus			Honduras, Tegucigalpa, La Cuerva Archago	Northern		P	Photo of specimen (GB or LH)
AMNH	128132	Dasypus	novemcinctus			Honduras, Tegucigalpa, La Cuerva Archago	Northern		P	Photo of specimen (GB or LH)
AMNH	171921	Dasypus	novemcinctus			Mexico, Colima, Pueblo Juarez	Northern		P	Photo of specimen (GB or LH)
AMNH	171919	Dasypus	novemcinctus			Mexico, Colima, Pueblo Juarez	Northern		P	Photo of specimen (GB or LH)
AMNH	171922	Dasypus	novemcinctus			Mexico, Colima, Pueblo Juarez	Northern		P	Photo of specimen (GB or LH)
AMNH	171920	Dasypus	novemcinctus			Mexico, Colima, Pueblo Juarez	Northern		P	Photo of specimen (GB or LH)
AMNH	2134	Dasypus	novemcinctus			Mexico, Jalisco, Tonila, volcan de fuego	Northern		P	Photo of specimen (GB or LH)
AMNH	208912	Dasypus	novemcinctus			Mexico, Oaxaca, Tehuantepec	Northern		P	Photo of specimen (GB or LH)
AMNH	24731	Dasypus	novemcinctus			Mexico, Sinaloa, Escuinapa	Northern		P	Photo of specimen (GB or LH)
AMNH	24059	Dasypus	novemcinctus			Mexico, Sinaloa, Escuinapa	Northern		P	Photo of specimen (GB or LH)
AMNH	211669	Dasypus	novemcinctus			Bolivia, Beni, Cercado, ca. 23 kilometers west of San Javier	Southern		P	Photo of specimen (GB or LH)
AMNH	255865	Dasypus	novemcinctus			Bolivia, Beni, 6kms west of Casarabe	Southern		P	Photo of specimen (GB or LH)
AMNH	205726	Dasypus	novemcinctus		Male	Uruguay, Durazno, San Jorge, 15 kilometers north northwest of san Jorge, Negro river	Southern	X		CT-scan platform at Univ. Montpellier (France); Resolution (after binning): 72,8µm
AMNH	133265	Dasypus	novemcinctus		Female	Brazil, Goias, Anapolis	Southern	X		CT-scan platform at Univ. Montpellier (France); Resolution (after binning): 72,8µm
AMNH	93116	Dasypus	novemcinctus		Male	Brazil, Amazonas, Parintins, Villa Bella Imperatriz, Amazon	Southern	X		CT-scan platform at Univ. Montpellier (France); Resolution (after binning): 72,8µm
AMNH	133259	Dasypus	novemcinctus	juv	Male	Brazil, Goias, Anapolis	Southern	X		CT-scan platform at Univ. Montpellier (France); Resolution (after binning): 72,8µm
AMNH	93735	Dasypus	novemcinctus		Male	Brazil, Amazonas, Parintins, Amazon River, south Bank	Southern		M	CT-scan platform at Univ. Montpellier (France); Resolution (after binning): 72,8µm
AMNH	365	Dasypus	novemcinctus			Brazil, Mato Grosso, Chapada dos Guimares	Southern	X		CT-scan platform at Univ. Montpellier (France); Resolution (after binning): 72,8µm
AMNH	133330	Dasypus	novemcinctus		Female	Brazil, Mato Grosso do Sul, Maracaju	Southern		M	CT-scan platform at Univ. Montpellier (France); Resolution (after binning): 72,8µm
AMNH	133341	Dasypus	novemcinctus		Male	Brazil, Ilha de Marajo, Curralinho	Southern		M	CT-scan platform at Univ. Montpellier (France); Resolution (after binning): 72,8µm
AMNH	133342	Dasypus	novemcinctus		Male	Brazil, Ilha de Marajo, Curralinho	Southern		M	CT-scan platform at Univ. Montpellier (France); Resolution (after binning): 72,8µm
AMNH	133397	Dasypus	novemcinctus		Male	Brazil, Mato Grosso do Sul, Maracaju	Southern		M	CT-scan platform at Univ. Montpellier (France); Resolution (after binning): 72,8µm
AMNH	91710	Dasypus	novemcinctus	sub	Male	Brazil, Amazonas, Borba, Madeira River, Auara lgarape	Southern		M	CT-scan platform at Univ. Montpellier (France); Resolution (after binning): 72,8µm
AMNH	205727	Dasypus	novemcinctus		Female	Uruguay, Lavalleja, Zapican, 12 kilometers west southwest of Zapican	Southern		M	CT-scan platform at Univ. Montpellier (France); Resolution (after binning): 72,8µm
AMNH	262659	Dasypus	novemcinctus	sub		Bolivia, Beni, Moxos, Trinidad	Southern		M	CT-scan platform at Univ. Montpellier (France); Resolution (after binning): 72,8µm
AMNH	33150	Dasypus	novemcinctus	stillborn?		Colombia, Quindui, Salento	JUV, STILLBORN	X		CT-scan platform at Univ. Montpellier (France); Resolution (after binning): 72,8µm
MHNG	MHNG 964 067	Dasypus	novemcinctus			Brazil	Southern	X		CT-scan platform at Univ. Montpellier (France); Resolution (after binning): 72,8µm
MNHN	1995-953 = AMNH-266784 (ou 266484)	Dasypus	novemcinctus	subadult	Male	Guyane: Paracou, 12kms SSE du Sinnamary	Guianan	X		CT-scan platform at Univ. Montpellier (France); Resolution (after binning): 72,8µm
MNHN	1996-587	Dasypus	novemcinctus			Guyane: Barrage Petit Saut	Guianan	X		CT-scan platform at Univ. Montpellier (France); Resolution (after binning): 72,8µm
MNHN	2001-1317	Dasypus	novemcinctus		Female	Guyane: Barrage Petit Saut	Guianan	X		AST-RX CT-scan platform (MNHN, Paris); Resolution (focus on skull): 59,4µm
MNHN	2000-1050	Dasypus	novemcinctus		Male	Guyane: Arataye	Guianan		M	CT-scan platform at Univ. Montpellier (France); Resolution (after binning): 72,8µm
MNHN	2006-565	Dasypus	novemcinctus			Para Brazil	Southern	X		CT-scan platform at Univ. Montpellier (France); Resolution (after binning): 72,8µm
MNHN	2007-371	Dasypus	novemcinctus			Florida USA	Northern		M	CT-scan platform at Univ. Montpellier (France); Resolution (after binning): 72,8µm
MNHN	2007-379	Dasypus	novemcinctus			Texas USA	Northern		M	CT-scan platform at Univ. Montpellier (France); Resolution (after binning): 72,8µm
IEPA	AM 78	Dasypus	novemcinctus		Female	Brazil: Amapa: north (savanas)	Guianan		M	CT-scan platform at Univ. Montpellier (France); Resolution (after binning): 72,8µm
IEPA	AP 207	Dasypus	novemcinctus		Male	Brazil: Amapa: north (savanas)	Guianan	X		CT-scan platform at Univ. Montpellier (France); Resolution (after binning): 72,8µm
RMNH	23952	Dasypus	novemcinctus			Suriname: Matta west of Zanderij	Guianan		M	CT-scan platform at Univ. Montpellier (France); Resolution (after binning): 72,8µm
RMNH	18024	Dasypus	novemcinctus		Male	Suriname: Lucie River	Guianan	X		CT-scan platform at Univ. Montpellier (France); Resolution (after binning): 72,8µm
RMNH	20958	Dasypus	novemcinctus		Female	Suriname: Mapane Creek	Guianan	X		CT-scan platform at Univ. Montpellier (France); Resolution (after binning): 72,8µm
LSU	8538	Dasypus	novemcinctus			Mexico, Tabasco, 12 mi NW of Balancan	Northern		M	CT-scan platform at Univ. Montpellier (France); Resolution (after binning): 72,8µm
LSU	29160	Dasypus	novemcinctus			USA, Mississipi, Hancock Co, 3 mi S Santa Rosa	Northern	X		CT-scan platform at Univ. Montpellier (France); Resolution (after binning): 72,8µm
LSU	15762	Dasypus	novemcinctus			Costa Rica, Alajuela Province, Florencia de San Carlos	Northern	X		CT-scan platform at Univ. Montpellier (France); Resolution (after binning): 72,8µm
LSU	3244	Dasypus	novemcinctus	juv		Mexico San Luis Potosi, Xilitla	Northern	X		CT-scan platform at Univ. Montpellier (France); Resolution (after binning): 72,8µm
LSU	31174	Dasypus	novemcinctus			USA, Louisiana, Avoyelles Parish, Lake Callahan, 1 mil DS of Cottonport City Hall	Northern		M	CT-scan platform at Univ. Montpellier (France); Resolution (after binning): 72,8µm
LSU	7157	Dasypus	novemcinctus			Belize, Cayo District, 1 mi S Augustine	Northern		M	CT-scan platform at Univ. Montpellier (France); Resolution (after binning): 72,8µm
LSU	12306	Dasypus	novemcinctus			Peru, Loreto department, Rio Curanja, Balta	Southern	X		CT-scan platform at Univ. Montpellier (France); Resolution (after binning): 72,8µm
LSU	31175	Dasypus	novemcinctus	juv		USA, Louisiana, Cameron Parish, Johnson's Bayou	Northern	X		CT-scan platform at Univ. Montpellier (France); Resolution (after binning): 72,8µm
LSU	29187	Dasypus	novemcinctus			USA, Mississipi, Hancock Co, 3 mi S Santa Rosa	Northern	X		CT-scan platform at Univ. Montpellier (France); Resolution (after binning): 72,8µm
NMNH	281290	Dasypus	novemcinctus		Male	Colombia, La Guajira, Fonseca, Las Marimondas	Problematic		M	CT-scan platform at Univ. Montpellier (France); Resolution (after binning): 72,8µm
NMNH	283467	Dasypus	novemcinctus		Male	Brazil, Minas Gerais	Southern	X		CT-scan platform at Univ. Montpellier (France); Resolution (after binning): 72,8µm
NMNH	339668	Dasypus	novemcinctus		Female	Tacatu (Takutu) River, Guyana	Guianan	X		CT-scan platform at Univ. Montpellier (France); Resolution (after binning): 72,8µm
NMNH	171052	Dasypus	novemcinctus		Male	Panama	Problematic	X		CT-scan platform at Univ. Montpellier (France); Resolution (after binning): 72,8µm
NMNH	339669	Dasypus	novemcinctus		Male	Tacatu (Takutu) River, Guyana	Guianan		M	CT-scan platform at Univ. Montpellier (France); Resolution (after binning): 72,8µm
NMNH	568206	Dasypus	novemcinctus			United States, Kansas, Cowley County	Northern		M	CT-scan platform at Univ. Montpellier (France); Resolution (after binning): 72,8µm
NMNH	033867	Dasypus	novemcinctus		Female	United States, Texas, Cameron County	Northern		M	CT-scan platform at Univ. Montpellier (France); Resolution (after binning): 72,8µm
NMNH	020920	Dasypus	novemcinctus	juv		Mexico, Morelos, Cuernavaca	Northern	X		CT-scan platform at Univ. Montpellier (France); Resolution (after binning): 72,8µm
NMNH	179172	Dasypus	novemcinctus	juv		Mexico	Northern	X		CT-scan platform at Univ. Montpellier (France); Resolution (after binning): 72,8µm
NMNH	406700	Dasypus	novemcinctus			Venezuela, 14 km W Clarines, South America, Venezuela, Anzoategui	Southern	X		CT-scan platform at Univ. Montpellier (France); Resolution (after binning): 72,8µm
NMNH	337563	Dasypus	novemcinctus		Female	Nicaragua, Hacienda San Isidro, El Real	Northern	X		CT-scan platform at Univ. Montpellier (France); Resolution (after binning): 72,8µm
ROM	ROM-32261	Dasypus	novemcinctus		Female	Guyana: Upper Takutu-Upper Essequibo: 10 miles N from Dadanawa	Guianan		M	CT-scan platform at Univ. Montpellier (France); Resolution (after binning): 72,8µm
ROM	ROM-31996	Dasypus	novemcinctus		Female	Guyana: Upper Takutu-Upper Essequibo: 10 miles N from Dadanawa	Guianan		M	CT-scan platform at Univ. Montpellier (France); Resolution (after binning): 72,8µm
ROM	ROM-32275	Dasypus	novemcinctus		Male	Guyana: Upper Takutu-Upper Essequibo: Dadanawa	Guianan	X		CT-scan platform at Univ. Montpellier (France); Resolution (after binning): 72,8µm
MUSM	11089	Dasypus	novemcinctus			Peru, Loreto, Maynas	Southern		P	Photo of specimen (GB or LH)
MUSM	6003	Dasypus	novemcinctus			Peru, Pucallpa	Southern		P	Photo of specimen (GB or LH)
BMNH	1-2-1-34	Dasypus	novemcinctus		Male	Bolivia, Bellavista	Southern		P	Photo of specimen (GB or LH)
BMNH	3-7-7-150	Dasypus	novemcinctus			Brazil, Chapada, Matto Grosso	Southern		P	Photo of specimen (GB or LH)
BMNH	1-6-6-85	Dasypus	novemcinctus		Female	Brazil, Piquete, S.Paulo	Southern		P	Photo of specimen (GB or LH)
BMNH	3-7-7-146	Dasypus	novemcinctus		Male	Brazil, Chapada, Matto grosso	Southern		P	Photo of specimen (GB or LH)
BMNH	3-7-7-147	Dasypus	novemcinctus			Brazil, Chapada, Matto grosso	Southern		P	Photo of specimen (GB or LH)
BMNH	3-7-7-149	Dasypus	novemcinctus			Brazil, Chapada, Matto grosso	Southern		P	Photo of specimen (GB or LH)
BMNH	3-9-4-102	Dasypus	novemcinctus		Male	Brazil, Eng. Reeve, Esperito Santo	Southern	X		CT-scan platform at IAC, NHM, London; Resolution (after binning): 101,7µm
BMNH	1-6-6-84	Dasypus	novemcinctus		Female	Brazil, Piquete, S.Paulo	Southern		P	Photo of specimen (GB or LH)
BMNH	28-10-11-54	Dasypus	novemcinctus		Male	Brazil, Sta Cathasina Hansa	Southern		P	Photo of specimen (GB or LH)
BMNH	11-10-27-3	Dasypus	novemcinctus			Paraguay	Southern	X		CT-scan platform at IAC, NHM, London; Resolution (after binning): 116µm
BMNH	26.1.12.22	Dasypus	novemcinctus		Female	Bolivia, Buenavista, Sta Cruz.	Southern	X		CT-scan platform at IAC, NHM, London; Resolution (after binning): 116µm
BMNH	65.5.18.2T	Dasypus				Guatemala	Northern	X		CT-scan platform at IAC, NHM, London; Resolution (after binning): 116µm
BMNH	16-7-12-37	Dasypus	novemcinctus			Ecuador, Gualea	Northern		P	Photo of specimen (GB or LH)
BMNH	3-9-4-101	Dasypus	novemcinctus		Male	Brazil, Esperito Santo	Southern		P	Photo of specimen (GB or LH)
BMNH	82-7-26-12	Dasypus	novemcinctus		Female	Mexico, Presidio, Mazatlan	Northern		P	Photo of specimen (GB or LH)
BMNH	82-9-30-32	Dasypus	novemcinctus			Brazil, Taquara, Rio Grande do Sul	Southern		P	Photo of specimen (GB or LH)
BMNH	93-1-1-17	Dasypus				Brazil, Rio Grande do Sul	Southern		P	Photo of specimen (GB or LH)
BMNH	98-3-2-153	Dasypus	novemcinctus		Male	Mexico, Rosario, Sinaloa	Northern	X		CT-scan platform at IAC, NHM, London; Resolution (after binning): 114µm
BMNH	14-4-25-86	Dasypus	novemcinctus		Male	Ecuador, Gualaquiza	Southern	X		CT-scan platform at IAC, NHM, London; Resolution (after binning): 114µm
BMNH	98-10-3-23	Dasypus	novemcinctus		Female	Colombia, Valdivia	Northern	X		CT-scan platform at IAC, NHM, London; Resolution (after binning): 113µm
BMNH	24-12-12-73	Dasypus	novemcinctus		Female	Peru, Moyobomba	Southern	X		CT-scan platform at IAC, NHM, London; Resolution (after binning): 113µm
BMNH	521183	Dasypus	novemcinctus		Female	Suriname, Zanderiyi	Guianan		P	Photo of specimen (GB or LH)
BMNH	52-633	Dasypus	novemcinctus			Belize, Brit Honduras	Northern		P	Photo of specimen (GB or LH)
BMNH	52-634	Dasypus	novemcinctus			Belize, Silkgrass	Northern		P	Photo of specimen (GB or LH)
BMNH	26-1-12-21	Dasypus	novemcinctus		Female	Bolivia, Buenavista	Southern		P	Photo of specimen (GB or LH)
BMNH	v5-7-5-21	Dasypus	novemcinctus		Male	Venezuela, Merida	Problematic	X		CT-scan platform at IAC, NHM, London; Resolution (after binning): 120µm
MBUCV	439	Dasypus	sabanicola	PARATYPE	Male	Rio Claro, Capanaparo, Mpo. Cunaviche, Apure, Venezuela	Southern		P	Photo accessed on the webpage of the collection of the Instituto de Zoología y Ecología Tropical, Venezuela
AMNH	205706	Dasypus	hybridus		Female	Uruguay, Lavalleja, Zapican, 12 kilometers west southwest of Zapican			L	CT-scan platform at Univ. Montpellier (France); Resolution (after binning): 72,8µm
AMNH	205721	Dasypus	hybridus		Male	Uruguay, treinta y Tres, 16 kilometers south southwest of Tacuari River mouth		X		CT-scan platform at Univ. Montpellier (France); Resolution (after binning): 72,8µm
AMNH	205693	Dasypus	hybridus		Female	Uruguay, Artigas, 6 km north northwest of Belen			L	CT-scan platform at Univ. Montpellier (France); Resolution (after binning): 72,8µm
NMNH	096511	Dasypus	hybridus			Argentina			L	CT-scan platform at Univ. Montpellier (France); Resolution (after binning): 72,8µm
BMNH	3-9-5-155	Dasypus	septemcinctus					X		CT-scan platform at IAC, NHM, London; Resolution (after binning): 102µm
BMNH	86-10-4-7	Dasypus	septemcinctus			Brazil?, Rio Granti			L	CT-scan platform at IAC, NHM, London; Resolution (after binning): 160µm
BMNH	3-7-7-152	Dasypus	septemcinctus		Female	Brazil, Chapada, Matto Grosso			L	CT-scan platform at IAC, NHM, London; Resolution (after binning): 160µm
BMNH	94-10-1-13	Dasypus	pilosus		Female			X		CT-scan platform at IAC, NHM, London; Resolution (after binning): 102µm
MUSM	7505	Dasypus	pilosus			Peru, san Martin dept			P	Photo of specimen (GB or LH)
MUSM	7501	Dasypus	pilosus			Peru, san Martin dept			P	Photo of specimen (GB or LH)
ROM	107299	Dasypus	kappleri			Guyana, Iwokrama Reserve, Burro Burro River, 25 km WNW of Kurupukari	Guianan KAPPLERI		L	CT-scan platform at Univ. Montpellier (France); Resolution (after binning): 72,8µm
ROM	108922	Dasypus	kappleri			Guyana, Turtle Mountain, 10 km NW of Kurupukari, Iwokrama Reserve	Guianan KAPPLERI		L	CT-scan platform at Univ. Montpellier (France); Resolution (after binning): 72,8µm
KWATA	Kap	Dasypus	kappleri			French Guiana	Guianan KAPPLERI		L	CT-scan platform at Univ. Montpellier (France); Resolution (after binning): 72,8µm
NMNH	388210	Dasypus	kappleri		Female	Venezuela, Amazonas, Rio Cunucunama	pastasae	X		CT-scan platform at Univ. Montpellier (France); Resolution (after binning): 72,8µm
NMNH	374825	Dasypus	kappleri			Venezuela, Venezuela, Bolivar, El Dorado, 59 kms SSE from El Dorado	Guianan KAPPLERI		L	CT-scan platform at Univ. Montpellier (France); Resolution (after binning): 72,8µm
LSU	9271	Dasypus	kappleri			Peru, Loreto Department, Rio Curanja	pastasae		L	CT-scan platform at Univ. Montpellier (France); Resolution (after binning): 72,8µm
RMNH	20962	Dasypus	kappleri		Male	Suriname: Bitagron (ex-Witagron) = east bank of Coppename River	Guianan KAPPLERI		L	CT-scan platform at Univ. Montpellier (France); Resolution (after binning): 72,8µm
AMNH	98812	Dasypus	kappleri		Male	Peru, Cusco, Canchis, Carachuma	pastasae		L	CT-scan platform at Univ. Montpellier (France); Resolution (after binning): 72,8µm
AMNH	76933	Dasypus	kappleri		Female	Venezuela, Amazonas, Atabapo, Mount Duida, Tamatama	pastasae		L	CT-scan platform at Univ. Montpellier (France); Resolution (after binning): 72,8µm
AMNH	136251	Dasypus	kappleri		Female	Colombia, Meta, Villavicencio	pastasae		L	CT-scan platform at Univ. Montpellier (France); Resolution (after binning): 72,8µm
BMNH	14-4-25-87	Dasypus	kappleri		Male	Ecuador, Gualaquiza	pastasae		L	CT-scan platform at IAC, NHM, London; Resolution (after binning): 268µm
BMNH	80-5-6-71	Dasypus	kappleri			Ecuador	pastasae		L	CT-scan platform at IAC, NHM, London; Resolution (after binning): 276µm
BMNH	67-4-29-1	Dasypus	kappleri			Suriname, no more info	Guianan KAPPLERI		L	CT-scan platform at IAC, NHM, London; Resolution (after binning): 276µm
